# Supplementary material
Source: PubMed Central journal article supplement (PMC6981337)
Supplement: 12195_2019_603_MOESM1_ESM.pdf [file 12195_2019_603_MOESM1_ESM.pdf]

## Supplemental Figures

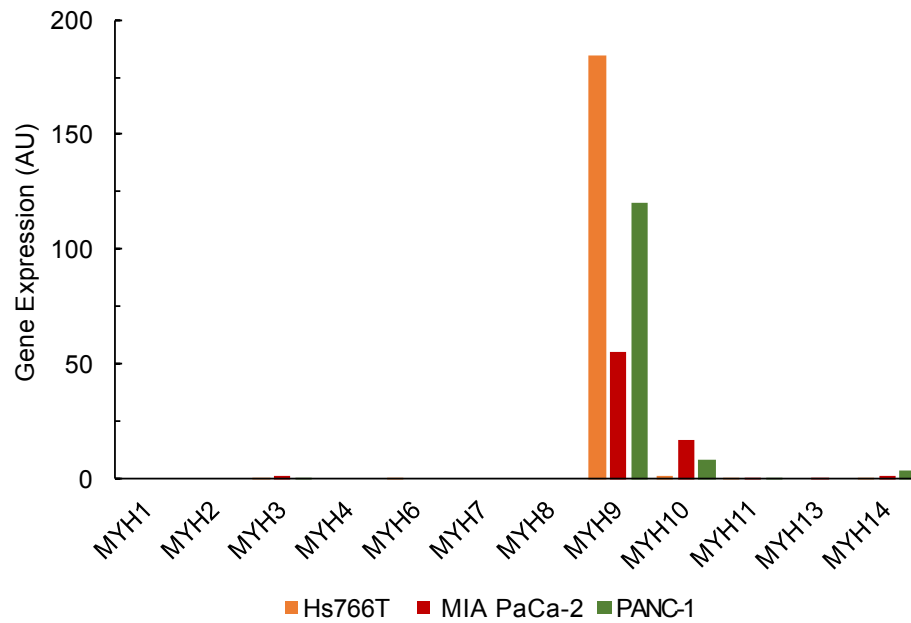

**Supplemental Figure 1. Myosin expression levels across panel of PDAC cell lines.** Bar plot represents arbitrary expression values of genes encoding myosin proteins as determined by analysis of RNAseq data from the Cancer Cell Line Encyclopedia (CCLE) (49).

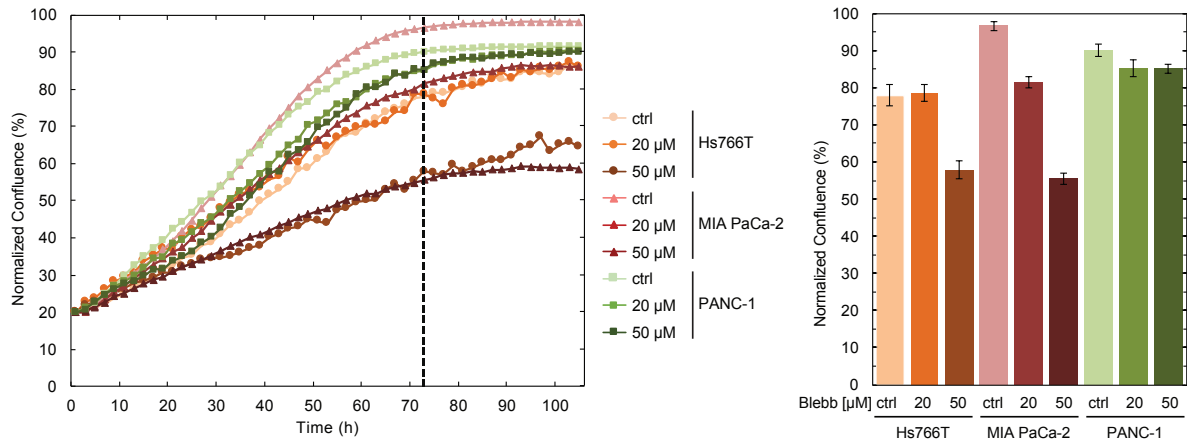

**Supplemental Figure 2. Blebbistatin decreases proliferation of Hs766T and MIA PaCa-2 cells.** (A) Proliferation measured by confluence of cell populations. Line plot shows the quantification of confluence over time. The dotted line indicates the 72 h time point, which we use to compare wound confluence values for statistical significance. Cells are treated with blebbistatin or DMSO (ctrl) from  $t = 0$ . (B) Bar plot showing average wound confluence at the 72 h time point. Error bars represent standard error from 3 independent experiments. Pairwise p-values are determined by a student's t-test. \* $p < 0.05$ .

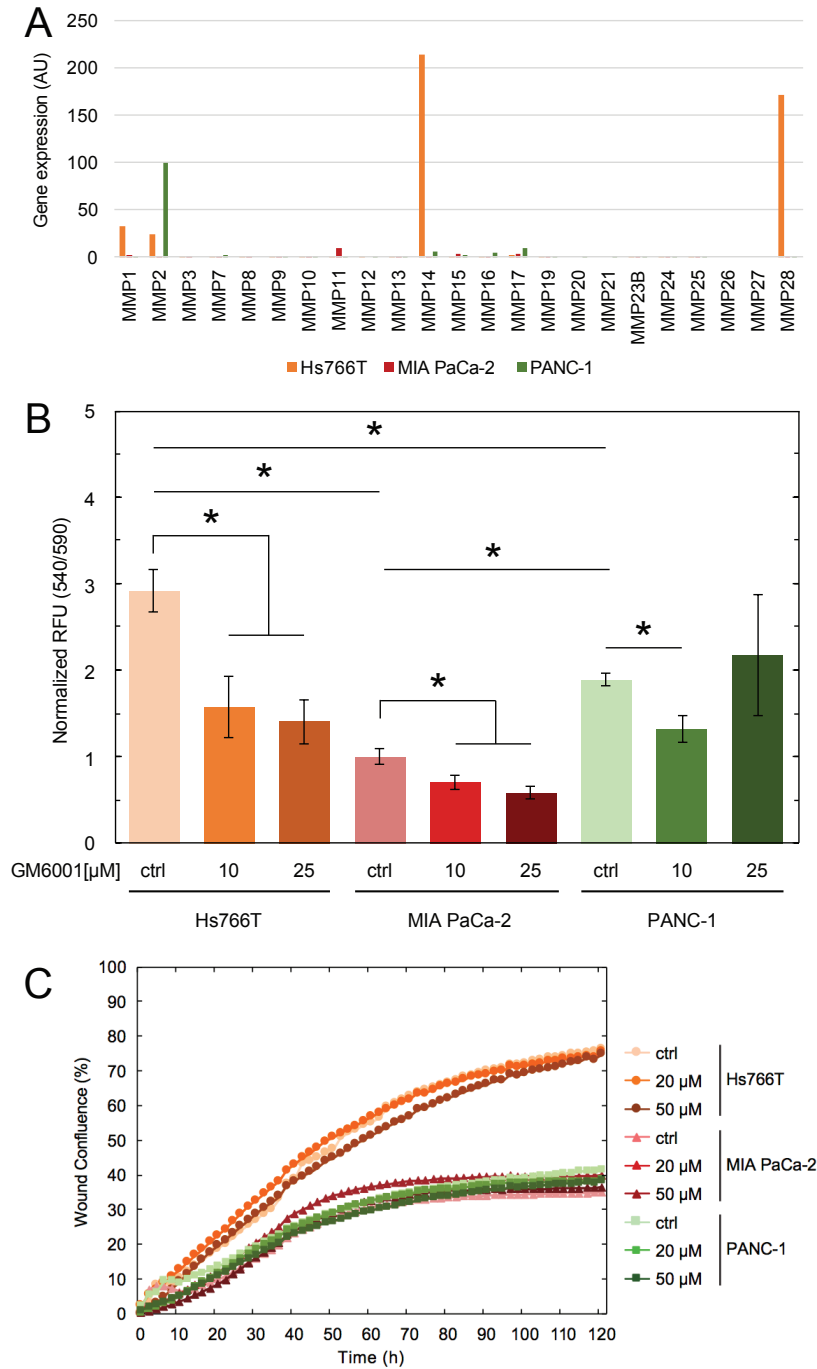

**Supplemental Figure 3. Matrix metalloproteinases (MMP) activity does not influence PDAC cell invasion through a protein matrix.** (A) Bar plot represents arbitrary expression values of genes encoding MMPs as determined by analysis of RNAseq data from the Cancer Cell Line Encyclopedia (CCLE) (49). (B) MMP activity levels of PDAC cell panel normalized to cell number. Error bars represent standard deviation from 3 independent experiments. Pairwise p-values are determined by a student's t-test. \* $p < 0.05$ . (C) Invasion through Matrigel is measured by wound confluence in 3D scratch wound invasion assays. Scatter plot shows the quantification of wound confluence over time. Cells are treated with the MMP inhibitor GM6001 or DMSO (ctrl) from  $t = 0$ .

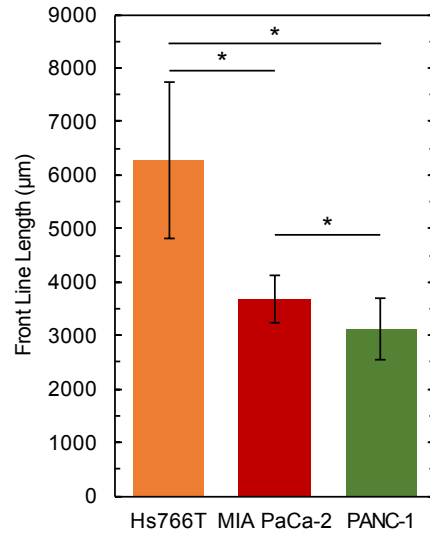

**Supplemental Figure 4. Hs766T cells have a greater front line length than MIA PaCa-2 and PANC-1 cells.** Front line length measured from representative IncuCyte invasion images. Error bars represent standard deviation from 3 independent experiments. Pairwise p-values are determined by a student's t-test. \*p < 0.05.

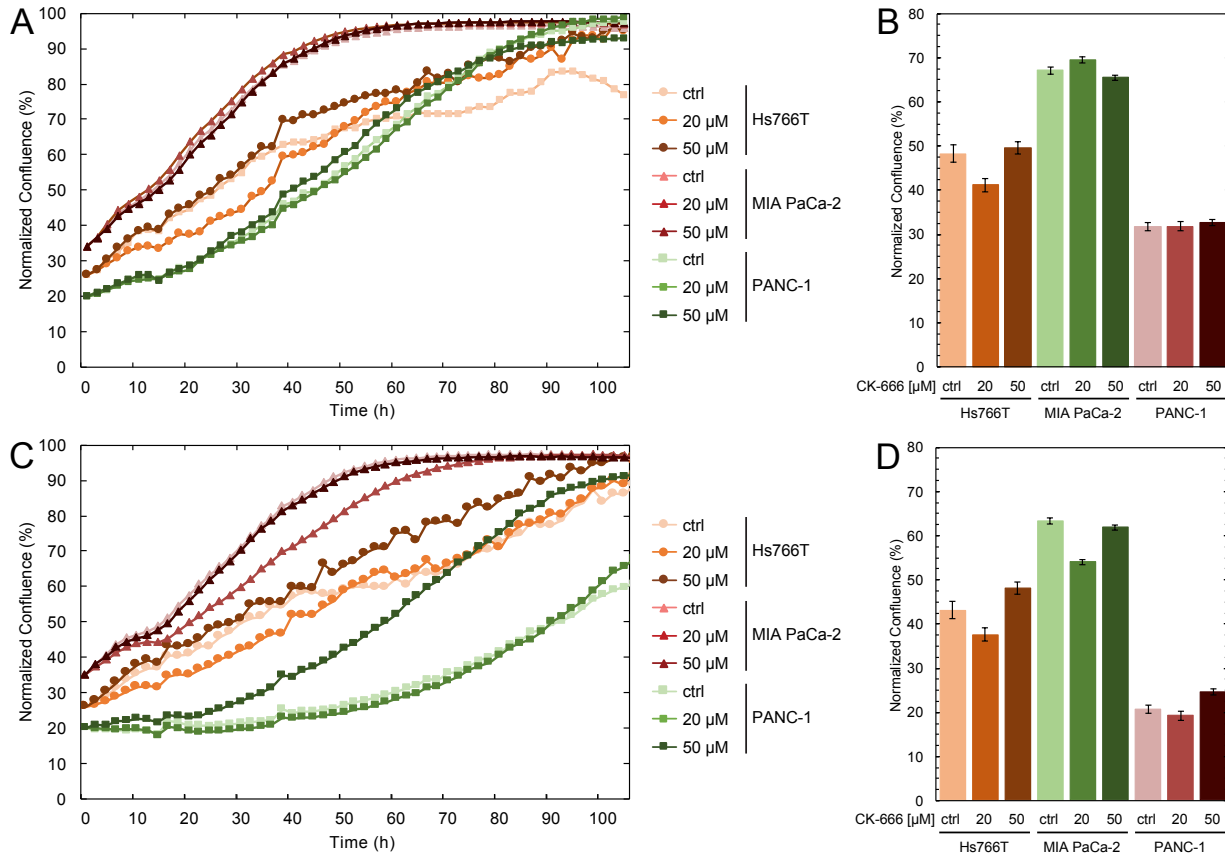

**Supplemental Figure 5. CK-666 and SMIFH2 do not significantly affect PDAC cell proliferation at 24 h.** (A) Proliferation measured by confluence of cell populations. Line plot shows the quantification of confluence over time. The dotted line indicates the 24 h time point, which we use to compare wound confluence values for statistical significance. Cells are treated with CK-666 or DMSO (ctrl) from  $t = 0$ . (B) Bar plot showing average wound confluence at the 24 h time point. (C) Proliferation measured by confluence of cell populations. Line plot shows the quantification of confluence over time. The dotted line indicates the 24 h time point, which we use to compare wound confluence values for statistical significance. Cells are treated with CK-666 or DMSO (ctrl) from  $t = 0$ . (D) Bar plot showing average wound confluence at the 24 h time point. Error bars represent standard error from 3 independent experiments. Pairwise p-values are determined by a student's t-test. \* $p < 0.05$ .
